# Sex differences in elite track and field performances and inferences about steroid doping

Diana B. Collantes, MD<sup>1</sup>; Jonathon W. Senefeld, PhD<sup>2,3</sup>; Kathryn F. Larson, MD<sup>4</sup>; Doriane Lambelet Coleman, JD<sup>5</sup>; Michael J. Joyner, MD<sup>1,6</sup>; Shalaya Kipp, PhD<sup>1</sup>✉

## Author Affiliations

<sup>1</sup>Department of Anesthesiology and Perioperative Medicine, Mayo Clinic, Rochester, Minnesota

<sup>2</sup>Department of Health and Kinesiology, University of Illinois Urbana-Champaign, Urbana, Illinois

<sup>3</sup>Beckman Institute for Advanced Science and Technology, University of Illinois Urbana-Champaign, Urbana, Illinois

<sup>4</sup>Department of Cardiovascular Medicine, Mayo Clinic, Rochester, Minnesota, USA

<sup>5</sup>Duke University School of Law, Durham, North Carolina

<sup>6</sup>Department of Physiology and Biomedical Engineering, Mayo Clinic, Rochester, Minnesota

## ✉Correspondence

Shalaya Kipp, PhD, Department of Anesthesiology and Perioperative Medicine  
Mayo Clinic | 200 First Street SW | Rochester, MN 55905  
[kipp.shalaya@mayo.edu](mailto:kipp.shalaya@mayo.edu)

## Additional Information

**Running title:** Sex differences in elite athletics and inferences about steroid doping  
**Keywords (3):** gender, athletics, sports, testosterone, androgens  
**Word count:** 3546 words  
**References:** 31 references  
**Subject Area:** Physiology and the Olympics

1 **Abstract**

2 Females likely experience larger performance benefits from androgenic-anabolic steroids  
3 than males. We set out to determine if there were temporal differences in select athletics  
4 (track and field) records between females and males. Exploratory aims included: 1)  
5 evaluating the improvements in female and male world records over time, and 2)  
6 investigating the influence of doping programs on male and female world records before and  
7 after 1990 when sport's governing bodies began to implement random out-of-competition  
8 and systematic in-competition drug testing. We collected the top 500 performances of all  
9 time for both sexes from an online database ([worldathletics.org](http://worldathletics.org)) in four running events  
10 (100m, 200m, 400m, and 800m) and two throwing events (discus throw and shot put). Data  
11 were stratified into quintiles based on world record ranking (1<sup>st</sup> to 100<sup>th</sup>, 101<sup>st</sup> to 200<sup>th</sup>, etc.).  
12 The temporal distribution of top 100 female performers was significantly earlier than top 100  
13 male performers (year: 2000±1 vs 2005±1, respectively;  $p < 0.001$ ). Within event, the top  
14 performances occurred significantly earlier for females in the 800m (year: 1995±15 vs  
15 2003±12;  $p < 0.001$ ) and shot put (year: 1992±14 vs 2003±17;  $p < 0.001$ ). Among females,  
16 world records rapidly improved through the 1980s, however following the 1990, the world  
17 records ceased to improve. Geographically, there was a greater representation of countries  
18 with state-sponsored doping programs, specifically among female performances. We  
19 postulate these sex differences in the temporal distribution of top performances are likely  
20 associated with enhanced effectiveness of exogenous androgens (steroid doping) among  
21 female athletes with lower endogenous androgen hormones compared to males.

22  
23  
24  
25  
26  
27  
28  
29

## 30 **Highlights**

### 31 **What is the central question of this study?**

32 Despite a longstanding notion that top performance in athletics occurred earlier for females  
33 compared to males, likely due to the larger performance benefits of androgenic-anabolic  
34 steroids, no study has compared this temporal relation. Thus, we examined the temporal  
35 distribution of select athletics events between females and males.

### 36 **What is the main finding and its importance?**

37 The top-100 female performances occurred earlier than the top-100 male performances.  
38 The sex-related temporal differences were particularly notable for the shot put and 800m.  
39 Furthermore, there was a greater representation of countries with known state-sponsored  
40 doping programs, specifically among females. Our analyses suggest anabolic-androgenic  
41 steroids played a greater role in the world's best female athletics performances.

## 42 Introduction

43 Luminaries of physiology have long recognized the scientific value of ‘real world  
44 data.’ For example, Nobel Prize laureate A.V. Hill, explained that “in the study of the  
45 physiology of muscular exercise there is a vast store of accurate information, hitherto  
46 almost unexploited, in the records of athletic sports and racing” (Hill, 1925). Careful  
47 examination of elite performances can provide key insights into the limits of human  
48 performance and provide a testbed to draw inferential conclusions about the physiological  
49 determinants of human performance. Specifically, observational study and ‘passive  
50 experimentation’ of the world’s most elite athletes enable the study of rare human  
51 phenotypes exposed to extreme and prolonged exercise training that are logistically difficult  
52 to study outside of small case studies or series (Lucia et al., 2006; Robinson et al., 1937;  
53 Jones, 2006; Joyner et al., 2023).

54 Three fundamental observations about human performance provide a theoretical  
55 framework to consider world record performances. First, record performance velocities are  
56 slower with longer distances. The hyperbolic relation between average performance speed  
57 and the duration of the athletic event, first identified by A.V. Hill a century ago, is now  
58 generally referred to as the “power-duration relation” and is observed within a wide range of  
59 whole-body activities as well as exercise with a single muscle group (Hill, 1925; Poole et al.,  
60 2016; Burnley, 2009; Jones, 2010). Second, males outperform females by about 5 to 35%  
61 with variation depending on the physiological requirements of the athletic event (Hunter et  
62 al., 2023; Hunter, 2024). Third, record performances improve across time (Weiss et al.,  
63 2016). These improvements are attributed to the dissemination of empirical learning based  
64 on trial and error, more accessible science-based knowledge on best practices in training  
65 and competition (Sandbakk et al., 2023), advancements in sports technology or techniques  
66 (Dyer, 2015), and expanded competitive opportunities, particularly among females (Joyner  
67 et al., 2010).

68 World records that do not follow all three fundamental observations are suspected  
69 of representing performances enhanced by an unfair advantage to the athlete, such as  
70 performance-enhancing drugs (e.g., androgenic steroids or erythropoietin). The female

71 athletics (track and field) world records that have failed to exhibit a consistent pattern of  
72 improvement over time have therefore aroused suspicions of doping. One example is the  
73 women's world record in the 400 meters (47.60 s) set by Marita Koch of East Germany in  
74 1985. Koch is widely believed to have used the anabolic steroid Turinabol for many years in  
75 the 1970s and 80s as part of a state-sponsored doping program (Franke & Berendonk, 1997).

76 Before sports governing bodies around the world committed to both random out-of-  
77 competition and systematic in-competition drug testing, robust state-sponsored and  
78 private-doping programs supported the widespread use by elite athletes of androgenic  
79 anabolic steroids among other performance enhancing drugs. Implementation of these  
80 doping programs occurred over a period of time, but the anti-doping commitment coalesced  
81 around 1990, in the period following the 1988 Olympic Games in Seoul. Therefore, we have  
82 broadly categorized two periods as pre and post 1990.

83 Androgenic-anabolic steroids are considered to be most effective among sporting  
84 events associated with maximal muscle power (Iyer and Handelsman, 2016). Additionally,  
85 they are likely more effective among females who have much lower endogenous androgen  
86 concentrations than males (Handelsman et al., 2018). Given the larger benefit females  
87 would experience from androgenic-anabolic steroids, and the historical, large-scale use of  
88 androgenic-anabolic steroids that resulted from state-sponsored and privately directed  
89 doping programs, we tested the hypothesis that top female performances would occur  
90 earlier than top male performances.

91 In a retrospective observational study, we evaluated performance year among the  
92 top 500 female and male athletes in events in the sport of athletics that may be influenced  
93 by the ergogenic effects of anabolic-androgenic steroids. Two additional exploratory aims  
94 of our analysis were to 1) evaluate the improvements in both female and male world records  
95 over time and 2) investigate the influence of state-sponsored doping programs by visually  
96 evaluating the geographical distribution of records in different periods of sport— before and  
97 after 1990.

98

99 **2 | Methods**

## 100 **2.1 | Ethical approval**

101 This retrospective observational study represents secondary use of data. All  
102 procedures accessed public information and did not require ethical review as determined  
103 by the Mayo Clinic Institutional Review Board in accordance with the Code of Federal  
104 Regulations, 45 CFR 46.102, and the Declaration of Helsinki. Performances of select  
105 outdoor athletics events of the top 500 male and female athletes were collected.

## 106 **2.2 | Primary analysis**

107 World Athletics, the international governing body for the sport of athletics, maintains  
108 a database of the all-time world's best performances for all its events. This publicly available  
109 online database (<https://worldathletics.org/records/all-time-toplists/>) served as the  
110 primary data source for this study. Data were extracted on 16 November 2023.

111 Performances from four track running events (100 m, 200 m, 400 m, and 800 m) and  
112 two field throwing events (discus throw and shot put) were collected, comprising the top 500  
113 all-time best female and male performers (i.e., athletes may only be represented once in the  
114 database). Informed by *a priori* discussions, data associated with other athletics events  
115 were excluded from data collection and analysis for several reasons. First, given the  
116 preeminence associated with Olympic events, events not currently contested in the  
117 Olympics were excluded. Second, we excluded Olympic events that were not contested by  
118 both sexes in the pre and post 1990 testing periods (hammer throw, triple jump, 400m  
119 hurdles). Third, endurance events were excluded because they benefit differently from  
120 anabolic-androgenic steroid use (1500 m, 5000 m, 3000 m steeplechase, 10,000 m,  
121 marathon, and 20 km race walk). Fourth, several events were excluded because they have  
122 been associated with significant changes across time, specifically technique (high jump and  
123 long jump), equipment (javelin throw, pole vault), and competition length (110/100 m  
124 hurdles).

125 In this framework, up to 6,000 data points could be abstracted: 500 performances ×  
126 6 athletics events × 2 sexes. Although complete datasets were almost ubiquitously  
127 available, data associated with the discus throw and shot put were incomplete for female  
128 athletes. We included 467 performances for female athletes and 468 performers for male

129 shot put athletes. Multiple male performers achieving the same mark (tie) accounted for the  
130 discrepancy in the number of performances. We included 351 performances for both female  
131 and male discus throwers. Thus, of the total 6,000 potential data points, 5,637  
132 performances were included in analyses. Data extracted included: athlete's name, nation  
133 represented, mark (finishing time or throw distance), and date of mark.

134 The primary outcome of these analyses was the year of competition associated with  
135 the top marks. Additionally, the data were stratified into quintiles based on performance  
136 place (i.e., 1<sup>st</sup>-100<sup>th</sup>; 101<sup>st</sup>-200<sup>th</sup>; 201<sup>st</sup>-300<sup>th</sup>; 301<sup>st</sup>-400<sup>th</sup>; 401<sup>st</sup>-500<sup>th</sup>) within each sex category  
137 (female, male).

138

### 139 **2.3 | Exploratory Analysis: World record progression**

140 In a separate set of analyses to determine the progression of athletics world records  
141 across time, we generated a second database of all-time female and male records (i.e.,  
142 individual athletes may be represented multiple times). This database comprised the top  
143 2,000 all-time records from 1900 to 16 November 2023. To ensure earlier records were  
144 accounted for we included the top 2,000 all-time records from 1900 until 1980. The  
145 progression of world record was plotted by finding the top performance for every year.

146

### 147 **2.4 | Exploratory Analysis: Geographical representation of top athletes**

148 To visually understand which countries contributed to the top performances, we  
149 created choropleth maps to depict the frequency of each over three different periods: (1) pre  
150 1990 (2) post 1990 and (3) all-time performances (1950-2023).

151 Due to changes in nation state boundaries, some previous boundaries were recoded  
152 to their modern-day equivalent. Specifically: East Germany and West Germany were coded  
153 to Germany. The Soviet Union was coded to Armenia, Azerbaijan, Belarus, Estonia, Georgia,  
154 Kazakhstan, Kyrgyzstan, Latvia, Lithuania, Moldova, Russia, Tajikistan, Turkmenistan,  
155 Ukraine, and Uzbekistan. The Unified Team (1992 Olympic team for former Soviet athletes  
156 except those from the Baltics) was coded to Armenia, Belarus, Georgia, Kazakhstan, Russia,  
157 and Uzbekistan. Czechoslovakia was coded to Czech Republic and Slovakia. Yugoslavia

158 was coded to Slovenia, Serbia, Montenegro, and Croatia. Former countries not included  
159 here did not have top athletes in the performance database.

## 160 **2.5 | Statistical analyses**

161 We tested normality using a Shapiro-Wilk test. Because the distribution of  
162 performances across years was not normally distributed, we used Kruskal–Wallis ANOVAs  
163 to compare the differences between females and males within a given quintile. When  
164 significant, we used a Wilcoxon rank sum test to determine where the differences were  
165 (event). We applied Bonferroni correction for post hoc analysis to account for multiple  
166 comparisons and conservatively set our significance level to  $p < 0.001$ . To test if the  
167 percentage of performances held before and after 1990 changed for a given country, we  
168 performed chi-squared tests. Analyses were performed using RStudio (Team, 2013; version  
169 4.3.2, RStudio, Boston, MA). Data are reported as mean  $\pm$  standard deviation in the tables  
170 and text, unless otherwise noted.

171

## 172 **3 | Results**

### 173 **3.1 | Performance Ranking**

174 Female top performances occurred significantly earlier than male top performances  
175 in the first, third and fourth quintiles (Figure 1, Table 1). When looking within each event, the  
176 top 100 female athletes (first quintile) for the 800m occurred significantly earlier than the  
177 top 100 male athletes for the 800m (year:  $1995 \pm 15$  vs  $2003 \pm 12$ ;  $P < 0.001$ ). The top female  
178 shot put performances also occurred earlier than the top male shot put performances in the  
179 first quintile (year:  $1992 \pm 14$  vs  $2003 \pm 17$ ;  $p < 0.001$ ), third quintile (year:  $1998 \pm 16$  vs  $2006 \pm 13$ ;  
180  $p < 0.001$ ), and fourth quintile (year:  $2000 \pm 17$  vs  $2007 \pm 15$ ;  $p < 0.001$ ). Although female  
181 performances occurred earlier than the male performances in the other four events, we  
182 found no statically significant sex differences in the 100m, 200m, 400m or discus to  
183 conclude that females are likely more advantaged than males by steroid doping.  
184 Performances stratified by quintile, sex and event can be found in Table 1.

185

### 186 **3.2 | Exploratory analysis of world record progression**



187 We performed an exploratory analysis of the world record progression for select  
188 athletics events. There is a visible improvement in world record performances across all  
189 events and among both sexes until 1990 (Figure 2). Although world records associated with  
190 male athletes have continued to progress after 1990, world records among female athletes  
191 have not progressed since the 1980s. The mean world record year for female was 1987 while  
192 the mean world record year for males was 2009. Table 2 shows the year the current world  
193 records were set; notably, all female records in the studied events were set between 1983  
194 and 1988.

195

### 196 **3.3 | Exploratory geographical analysis**

197 We performed an exploratory analysis of the geographical representation of top  
198 performances (Figure 3 and Table 3), in part to investigate the prevalence of top  
199 performances from countries with documented state-sponsored doping programs,  
200 specifically the German Democratic Republic (Fitch 2008; Franke & Berendonk) and former  
201 Soviet Union (Kalinski & Kerner, 2002). Among these formerly recognized regional areas  
202 (German Democratic Republic and Soviet Union) and their modern-day equivalents  
203 (Germany and namely Russia, respectively), there were markedly more performances  
204 before 1990. While the Soviet Union was comprised of many countries, we have chosen to  
205 focus on Russia given the large number of performances they achieved in the post 1990  
206 period. We calculated that 23% and 10.99% of the top all-time performances up to 1990  
207 were female and male athletes from Germany, respectively. After 1990, there was a  
208 significant decrease in the records held by German female (4.28%,  $p < 0.001$ ;  $X^2 = 164.32$ ) and  
209 male athletes (2.8%,  $p < 0.001$ ;  $X^2 = 65.33$ ). Russia showed a similar pattern, accounting for  
210 34.08% and 14.13% of the top female and male all-time performance up to 1990. After 1990,  
211 there was a significant decrease in the performances held by Russian females (8.74%,  
212  $p < 0.001$ ;  $X^2 = 179.02$ ) and male athletes (1.42%,  $p < 0.001$ ;  $X^2 = 167.14$ ). Other countries that  
213 held over 3% of the total performances before 1990 included: Romania, Bulgaria, the United  
214 Kingdom, and the United States. The United States recorded a large fraction of the male  
215 records prior to 1990 (37.36%), however in contrast to Germany and Russia, the fraction of

216 top records by male athletes in the United States was maintained after 1990 (31.26%,  
217  $p=0.04$ ;  $X^2 =4.15$ ). Females from United States represented 10.38% of the top female  
218 athletes up to 1990 and increased to 29.69% from 1990 to 2023 ( $p<0.001$ ;  $X^2=69.50$ ), a  
219 change which may be attributed to more competitive opportunities, professionalization for  
220 females and increased worldwide doping control.

221

## 222 **4 | Discussion**

223 This retrospective, observational study used ‘real-world data’ – elite athletics  
224 performances of females and males – to explore the temporal and geographical  
225 distributions of top athletes in select events that may have been influenced by the ergogenic  
226 effects of anabolic-androgenic steroids. Available data suggest an influential role of  
227 anabolic-androgenic steroids on the world’s best athletics athletes, particularly among  
228 female athletes. Several different analyses supported this primary finding. First, among the  
229 top 100 best athletics athletes within select events, the performance year associated with  
230 top athletes occurred earlier for females compared to males. These sex-related temporal  
231 differences were particularly notable for two events—shot put and 800s. Second, world  
232 records did not progress after 1990 among females. Lastly, there was a greater  
233 representation of countries with known state-sponsored doping programs, specifically  
234 among female performances. In this context, our analyses suggest anabolic-androgenic  
235 steroids played a substantial role in the world’s best athletics performances, especially  
236 among female athletes.

237

### 238 **4.1 | Potential contribution of anabolic-androgenic steroids**

239 Androgenic-anabolic steroids, synthetic derivatives of the hormone testosterone,  
240 have long been recognized for their potential to enhance athletic performance and have  
241 influenced sporting culture particularly in countries with state-sponsored doping programs  
242 (Handelsman, 2021). Notably, early scientists and physicians found that androgen doping  
243 was particularly effective in females, especially in events requiring speed and strength  
244 (Franke & Berendonk, 1997). Because adult males have about 15-fold greater endogenous

245 testosterone concentrations than adult females (Senefeld & Hunter, 2024; Nokoff et al.,  
246 2023), the sigmoidal dose response relationship for exogenous androgens differs between  
247 females and males (Huang & Basaria, 2018; Handelsman et al., 2018). Females with lower  
248 endogenous testosterone concentrations likely experience greater performance benefits  
249 with exposure to lower doses of exogenous androgens compared to males who have higher  
250 endogenous testosterone concentrations (Huang & Basaria, 2018; Handelsman et al.,  
251 2018). In the dose and response curve context, with a similar exposure to exogenous  
252 androgens, females may experience substantial performance enhancement and males  
253 likely experience a small, blunted ergogenic effect compared to females.

254

## 255 **4.2 | Historical context**

256 The androgenic effects associated with testosterone were characterized in the 1930s  
257 and exogenous androgens were adopted in sport during the early years of the Cold War likely  
258 due to sociopolitical pressures to demonstrate geopolitical supremacy (Handelsman, 2021;  
259 Iyer and Handelsman, 2016). In this framework, several countries embraced a national  
260 system of androgen doping to improve sport performance commonly known as ‘state-  
261 sponsored doping programs’ (Fitch, 2008). The differential performance enhancing effects  
262 of androgen doping on females was noted. For example, after the collapse of the German  
263 Democratic Republic, documents were recovered that provided detailed information of the  
264 specifics of their doping program, notably the heavy use of androgenic-anabolic steroids on  
265 female athletes:

266 *“From our experiences made so far it can be concluded that women have the greatest*  
267 *advantage from treatments with anabolic hormones with respect to their performance in*  
268 *sport....”*-- March 3, 1977, SMD Deputy Director Hoppner; Vol. II of his Stasi reports under  
269 the code name “Technik,” pp. 243–44. (Franke & Berendonk, 1997).

270 Although the International Olympic Committee prohibited the use of androgenic  
271 anabolic steroids in-competition in 1974, thereafter drug testing at the Olympics was  
272 conducted in an overt and predictable pattern allowing the opportunity for athletes  
273 temporarily to cease androgen use before the Games. In this context, widespread

274 androgenic anabolic steroid use continued until the sport's governing bodies became  
275 serious about comprehensive in and out of competition drug testing in the period following  
276 the 1988 Olympic Games in Seoul (Blackwell, 1991; Jacobs & Samuels, 1994). This shift in  
277 policy together with the geopolitical events that caused the collapse of the German  
278 Democratic Republic, the Soviet Union, and their respective doping programs is associated  
279 with a stagnation in female records.

280 It is noteworthy that in the West, societal norms around female participation in sports  
281 changed, opportunities for participation expanded, and participation numbers surged in the  
282 post 1990 period. In light of these developments, Whipp and Ward (1992) calculated a  
283 steeper progression of the female world records for track events, extrapolating mean  
284 running velocities to pose the hypothetical question '*will women soon outrun men?*' and it  
285 was postulated that female world records would have declined to a greater extent than male  
286 records in the past three decades (Cheuvront et al., 2005). However, this was not observed  
287 and, as illustrated in the current study, it contrasts with the patterns observed in world  
288 record progression for select athletics events.

289

### 290 **4.3 | Perspective**

291 Careful examination of elite athletics data can provide key insights into human  
292 performance and provide inferential conclusions about performance physiology. Although  
293 our study faced several limitations enumerated below, our results provide several lines of  
294 evidence suggesting an influential role of anabolic-androgenic steroids on world's best  
295 athletics performances, particularly among female athletes competing in 800s and shot put.  
296 First, female top performances occurred earlier than male top performances. Second, our  
297 exploratory analyses of world record progression showed female records were established  
298 in the 1980 and 1990, while male records continue to improve. Third, geographic analysis  
299 reveals countries with state-sponsored doping programs are over-represented prior to 1990.

300

### 301 **4.4 | Limitations**

302 Our study quantified records of select athletics events without assessment of  
303 physiologic factors and other influential factors, such as prize money incentives, better  
304 tracks, and advanced footwear technology (Dyer, 2015). We were limited to publicly  
305 available data that did not include information on performance-influencing factors such as  
306 performance enhancing drug use. While anabolic-androgenic steroids have been the focus  
307 of this paper, other performance enhancing drugs may have been taken concurrently, such  
308 as human growth hormone. Another potential limitation was that our geographic analysis  
309 used the country an athlete represented, which may not have reflected where the athlete  
310 was from or trained. Also, our analyses were restricted to a subset of events, which limits  
311 the generalizability of our findings. In this framework, our retrospective, observational study  
312 design limits the physiologic and mechanistic insights that can be deduced directly from the  
313 available data. Despite these limitations, our study provides several different analyses  
314 which converge in the inferential conclusion that anabolic-androgenic steroids have  
315 influenced the world's best performances and world records in athletics, particularly among  
316 female athletes.

317

## 318 **5 | Conclusions**

319 Our analyses show that among the top 100 best athletics athletes in several select  
320 events, the performance year associated with top performances was earlier for females  
321 compared to males. Furthermore, the female world records in each of these events were set  
322 in the 1980s, while male world records continue to improve. Exploratory geographic analysis  
323 also revealed that countries which had state-sponsored doping programs at the time are  
324 over-represented prior to implementation of systematic in- and out-of-competition drug  
325 testing, the pre 1990 period. These analyses suggest an influential role of anabolic-  
326 androgenic steroids on world's best athletics performances, particularly among female  
327 athletes competing in 800m and shot put events.

328

## 329 **Author Contributions**

330 Conceptualization: Jonathon W. Senefeld, Michael J. Joyner, Shalaya Kipp. Data curation:  
331 Diana B. Collantes, Jonathon W. Senefeld. Kathryn F. Larson, and Shalaya Kipp. Data  
332 analysis: Shalaya Kipp. Writing—original draft: Diana B. Collantes and Shalaya Kipp.  
333 Writing—review & editing: Diana B. Collantes, Jonathon W. Senefeld, Kathryn F. Larson,  
334 Doriane Lambelet Coleman, Michael J. Joyner, and Shalaya Kipp. All authors have read and  
335 approved the final version of the manuscript and agree to be accountable for all aspects of  
336 the work in ensuring that questions related to the accuracy or integrity of any part of the work  
337 are appropriately investigated and resolved. All persons designated as authors qualify for  
338 authorship, and all those who qualify for authorship are listed.

339

#### 340 **Conflict of Interest**

341 The authors declare no conflicts of interest.

342

#### 343 **Funding Statement**

344 The authors declare no funding was received for this work.

345

#### 346 **Data Availability Statement**

347 The analyzed datasets supporting this study are publicly available online at the World  
348 Athletics website. Supporting data are available upon reasonable request.

349

#### 350 **ORCID**

351 Diana B. Collantes <https://orcid.org/0009-0007-1401-9828>

352 Jonathon W. Senefeld <https://orcid.org/0000-0001-8116-3538>

353 Kathryn F. Larson <https://orcid.org/0000-0003-2565-3318>

354 Michael J. Joyner <https://orcid.org/0000-0002-7135-7643>

355 Shalaya Kipp <https://orcid.org/0000-0002-4628-3216>

## References.

- Blackwell, J. (1991). Discourses on drug use: The social construction of a steroid scandal. *Journal of Drug Issues*, 21(1), 147-164.
- Burnley, M. (2009). Estimation of critical torque using intermittent isometric maximal voluntary contractions of the quadriceps in humans. *Journal of Applied Physiology*, 106(3), 975-83.
- Chevront, S.N., Carter, R., Deruisseau, K.C., & Moffatt, R.J. (2005). Running performance differences between men and women: an update. *Sports Medicine*, 35(12), 1017-24.
- Dyer, B. (2015). The controversy of sports technology: a systematic review. *SpringerPlus*, 4, 1-12.
- Fitch, K.D. (2008). Androgenic-anabolic steroids and the Olympic Games. *Asian Journal of Andrology*, 10(3), 384-90.
- Franke, W.W., & Berendonk, B. (1997). Hormonal doping and androgenization of athletes: a secret program of the German Democratic Republic government. *Clinical Chemistry*, 43(7), 1262-79.
- Handelsman, D. J., Hirschberg, A. L., & Bermon, S. (2018). Circulating testosterone as the hormonal basis of sex differences in athletic performance. *Endocrine Reviews*, 39(5), 803-829.
- Handelsman, D.J. (2021). Androgen Misuse and Abuse. *Endocrine Review*, 42(4), 457-501.
- Hill, A. V. (1925). The physiological basis of athletic records. *The Scientific Monthly*, 21(4), 409-428.
- Huang, G., & Basaria, S. (2018). Do anabolic-androgenic steroids have performance-enhancing effects in female athletes?. *Molecular and Cellular Endocrinology*, 464, 56-64.
- Hunter, S.K., S. Angadi, S., Bhargava, A., Harper, J., Hirschberg, A.L., D. Levine, B., L. Moreau, K., J. Nokoff, N., Stachenfeld, N.S., & Bermon, S. (2023). The Biological Basis of Sex Differences in Athletic Performance: Consensus Statement for the American College of Sports Medicine. *Medicine and Science in Sports Exercise*, 55(12), 2328-2360.
- Hunter, S. K. (2024). Age and Sex Differences in the Limits of Human Performance: Fatigability and Real-World Data. *Journal of Applied Physiology*.
- Iyer, R., & Handelsman, D.J. (2016) Androgens. *Frontiers of Hormone Research*, 47, 82-100.
- Jacobs, J. B., & Samuels, B. (1994). The drug testing project in international sports: Dilemmas in an expanding regulatory regime. *Hastings Int'l & Comp. L. Rev.*, 18, 557.

Jones, A. M. (2006). The physiology of the world record holder for the women's marathon. *International Journal of Sports Science & Coaching*, 1(2), 101-116.

Jones, A.M., Vanhatalo, A., Burnley, M., Morton, R.H., & Poole, D.C. (2010). Critical power: implications for determination of VO<sub>2</sub>max and exercise tolerance. *Medicine and Science in Sports Exercise*, 42(10),1876-90.

Joyner, M. J., Hunter, S. K., Lucia, A., & Jones, A. M. (2020). Physiology and fast marathons. *Journal of Applied Physiology*, 128(4), 1065-1068.

Joyner, M.J., Wiggins, C.C., Baker, S.E., Klassen, S.A., & Senefeld, J.W. (2023) Exercise and Experiments of Nature. *Comprehensive Physiology*, 13(3),4879-4907.

Kalinski, M. I., & Kerner, M. S. (2002). Empfehlungen zum Einsatz von anabolen Steroiden im Sport aus der ehemaligen Sowjetunion–Daten aus einem geheimen Dokument. *Deutsche Zeitschrift für Sportmedizin*, 53(11).

Kanayama, G., & Pope Jr, H. G. (2018). History and epidemiology of anabolic androgens in athletes and non-athletes. *Molecular and Cellular Endocrinology*, 464, 4-13.

Lucia, A., Esteve-Lanao, J., Olivan, J., Gomez-Gallego, F., San Juan, A. F., Santiago, C., ... & Foster, C. (2006). Physiological characteristics of the best Eritrean runners—exceptional running economy. *Applied Physiology, Nutrition, and Metabolism*, 31(5), 530-540.

Muggeo, V. M. (2008). Segmented: an R package to fit regression models with broken-line relationships. *R news*, 8(1), 20-25.

Nokoff, N.J., Senefeld, J., Krausz, C., Hunter, S.K., & Joyner, M.J. (2023). Sex Differences in Athletic Performance: Perspectives on Transgender Athletes. *Exercise and Sport Science Review*, 51(3),85-95.

Poole, D.C., Burnley, M., Vanhatalo, A., Rossiter, H.B., & Jones, A.M. (2016). Critical Power: An Important Fatigue Threshold in Exercise Physiology. *Medicine and Science in Sports Exercise*, 48(11),2320-2334.

Robinson, S., Edwards, H.T., & Dill, D.B. (1937). New Records in Human Power. *Science*, 85(2208),409-10.

Sandbakk, Ø., Pyne, D. B., McGawley, K., Foster, C., Talsnes, R. K., Solli, G. S., ... & Sandbakk, S. B. (2023). The Evolution of World-Class Endurance Training: The Scientist's View on Current and Future Trends. *International Journal of Sports Physiology and Performance*, 1(aop), 1-5.

Senefeld, J. W., & Hunter, S. K. (2024). Hormonal basis of biological sex differences in human athletic performance. *Endocrinology*, bqae036.

R Core Team. (2016). R: A language and environment for statistical computing. R Foundation for Statistical Computing, Vienna, Austria. <http://www.R-project.org/>.



Verroken, M., & Mottram, D. R. (2003). Doping control in sport. *Drugs in Sport* (pp. 317-366). Routledge.

Weiss, M., Newman, A., Whitmore, C., & Weiss, S. (2016). One hundred and fifty years of sprint and distance running—Past trends and future prospects. *European Journal of Sport Science*, 16(4), 393-401.

Whipp, B. J., & Ward, S. (1992). Will women soon outrun men?. *Nature*, 355(6355), 25-25.

## Tables

**Table 1.** Mean year of top performances for a given ranking quintile. Data is presented mean  $\pm$  SD.

| <b>Performance Ranking</b> | <i>First quintile<br/>1-100 **</i> |               | <i>Second quintile<br/>101-200</i> |               | <i>Third quintile<br/>201-300**</i> |               | <i>Fourth quintile<br/>301-400**</i> |               | <i>Fifth quintile<br/>401-500</i> |               |
|----------------------------|------------------------------------|---------------|------------------------------------|---------------|-------------------------------------|---------------|--------------------------------------|---------------|-----------------------------------|---------------|
|                            | <b>Event:</b><br>Females           | Males         | Females                            | Males         | Females                             | Males         | Females                              | Males         | Females                           | Males         |
| <b>100m</b>                | 2010 $\pm$ 13                      | 2012 $\pm$ 11 | 2008 $\pm$ 14                      | 2010 $\pm$ 12 | 2007 $\pm$ 15                       | 2010 $\pm$ 13 | 2008 $\pm$ 14                        | 2009 $\pm$ 13 | 2002 $\pm$ 16                     | 2005 $\pm$ 15 |
| <b>200m</b>                | 2007 $\pm$ 15                      | 2009 $\pm$ 14 | 2004 $\pm$ 14                      | 2005 $\pm$ 16 | 2008 $\pm$ 14                       | 2005 $\pm$ 14 | 2005 $\pm$ 14                        | 2005 $\pm$ 13 | 2006 $\pm$ 14                     | 2005 $\pm$ 16 |
| <b>400m</b>                | 2004 $\pm$ 14                      | 2006 $\pm$ 15 | 2003 $\pm$ 15                      | 2002 $\pm$ 14 | 2004 $\pm$ 14                       | 2005 $\pm$ 14 | 2003 $\pm$ 15                        | 2002 $\pm$ 17 | 2007 $\pm$ 15                     | 2005 $\pm$ 16 |
| <b>800m</b>                | 1995 $\pm$ 15*                     | 2003 $\pm$ 12 | 2002 $\pm$ 15                      | 2004 $\pm$ 15 | 2000 $\pm$ 15                       | 2005 $\pm$ 16 | 2000 $\pm$ 15                        | 2004 $\pm$ 16 | 2003 $\pm$ 14                     | 2001 $\pm$ 15 |
| <b>Discus Thow</b>         | 1995 $\pm$ 14                      | 1999 $\pm$ 15 | 1999 $\pm$ 14                      | 2000 $\pm$ 17 | 1999 $\pm$ 15                       | 1997 $\pm$ 16 | 2001 $\pm$ 17                        | 1992 $\pm$ 16 | -                                 | -             |
| <b>Shot Put</b>            | 1992 $\pm$ 14*                     | 2003 $\pm$ 17 | 2001 $\pm$ 15                      | 2001 $\pm$ 17 | 2006 $\pm$ 13*                      | 1998 $\pm$ 16 | 2007 $\pm$ 15*                       | 2000 $\pm$ 17 | 2007 $\pm$ 13                     | 2001 $\pm$ 16 |

\* Indicates significant sex difference within a quintile, for a given event.

\*\* Indicates a significant sex difference within a given bin.

Data associated with the shot put and discus throw were incomplete for female athletes.

Significance was set to  $p < 0.001$ .

**Table 2.** Year associated with current world record <sup>a</sup>.

| <b>Event</b> | <b>Females<sup>b</sup></b> | <b>Males</b> |
|--------------|----------------------------|--------------|
| 100 m dash   | 1988                       | 2009         |
| 200 m dash   | 1988                       | 2009         |
| 400 m dash   | 1985                       | 2016         |
| 800 m run    | 1983                       | 2012         |
| Discus throw | 1988                       | 1986         |
| Shot put     | 1987                       | 2023         |

<sup>a</sup> Current world records as of 25 March 2024.

<sup>b</sup> Note each of the selected female world records were set in the 1980s before 'out-of-competition' drug testing was implemented in 1989.

**Table 3.** Percentage of performances held by female and male athletes for their respective countries from 1950-1989, before the implementation of out-of-competition drug testing; and from 1990-2023, after the implementation of out-of-competition drug testing. We included only countries that held >3% of the records for either sex at any time point.

| <b>Country:</b>       | <b>1950-1989</b><br>Before implementation of out-of-competition testing |       | <b>1990-2023</b><br>After implementation of out-of-competition testing |       | <i>Female</i> |         | <i>Male</i> |         |
|-----------------------|-------------------------------------------------------------------------|-------|------------------------------------------------------------------------|-------|---------------|---------|-------------|---------|
|                       | Females                                                                 | Males | Females                                                                | Males | $\chi^2$      | p-value | $\chi^2$    | p-value |
| <b>United States</b>  | 10.4%                                                                   | 37.4% | 29.7%                                                                  | 31.3% | 69.5          | <0.001* | 4.2         | 0.042   |
| <b>Russia</b>         | 34.1%                                                                   | 14.1% | 8.7%                                                                   | 1.4%  | 179.0         | <0.001* | 167.1       | <0.001* |
| <b>Germany</b>        | 23.0%                                                                   | 11%   | 4.3%                                                                   | 2.8%  | 164.3         | <0.001* | 65.3        | <0.001* |
| <b>China</b>          | 1.0%                                                                    | 0%    | 5.8%                                                                   | 0.6%  | 26.0          | <0.001* | -           | -       |
| <b>United Kingdom</b> | 3.8%                                                                    | 3.1%  | 3.7%                                                                   | 4.8%  | <0.01         | 0.910   | 2.9         | 0.090   |
| <b>Romania</b>        | 4.9%                                                                    | 0.3%  | 0.9%                                                                   | 0.3%  | 45.0          | 0.001*  | 0.01        | 0.978   |
| <b>Jamaica</b>        | 0.8%                                                                    | 1.6%  | 6.5%                                                                   | 5.7%  | 32.9          | 0.001*  | 17.4        | 0.003   |
| <b>Kenya</b>          | 0.1%                                                                    | 2.8%  | 1.1%                                                                   | 5.3%  | 5.3           | 0.210   | 6.2         | 0.012   |
| <b>Bulgaria</b>       | 4.6%                                                                    | 1.9%  | 0.7%                                                                   | 0.2%  | 48.6          | 0.001*  | 24.8        | <0.001* |

\*Significance was set to  $p < 0.001$ .

### Figure Legends and Figures

**Figure 1. Temporal density plots of top performances for females and males athletics athletes.** The 500 performances per event and sex are stratified by quintile according to ranking. The first quintile includes the top performance (1) to the 100<sup>th</sup> performance. The second quintile includes the 101<sup>st</sup> performance to the 200<sup>th</sup> performance. The third quintile includes the 201<sup>st</sup> performance to the 300<sup>th</sup> performance. The fourth quintile includes the 301<sup>st</sup> performance to the 400<sup>th</sup> performance. The fifth quintile includes the 401<sup>st</sup> performance to the 500<sup>th</sup> performance.

**Figure 2. World record progression for Athletics events.** Red lines represent female world records over time and blue lines represent male world records over time. The corresponding filled circles indicate current world records.

**Figure 3. World Map showing distribution of top athletics athletes.** The top panel (A) shows the number of athletes from each country from 1950-1989 (year out of competition drug testing started). The middle panel (B) shows the number of athletes from 1990-2023. The bottom panel (C) shows the all-time number of athletes (1950-2023).

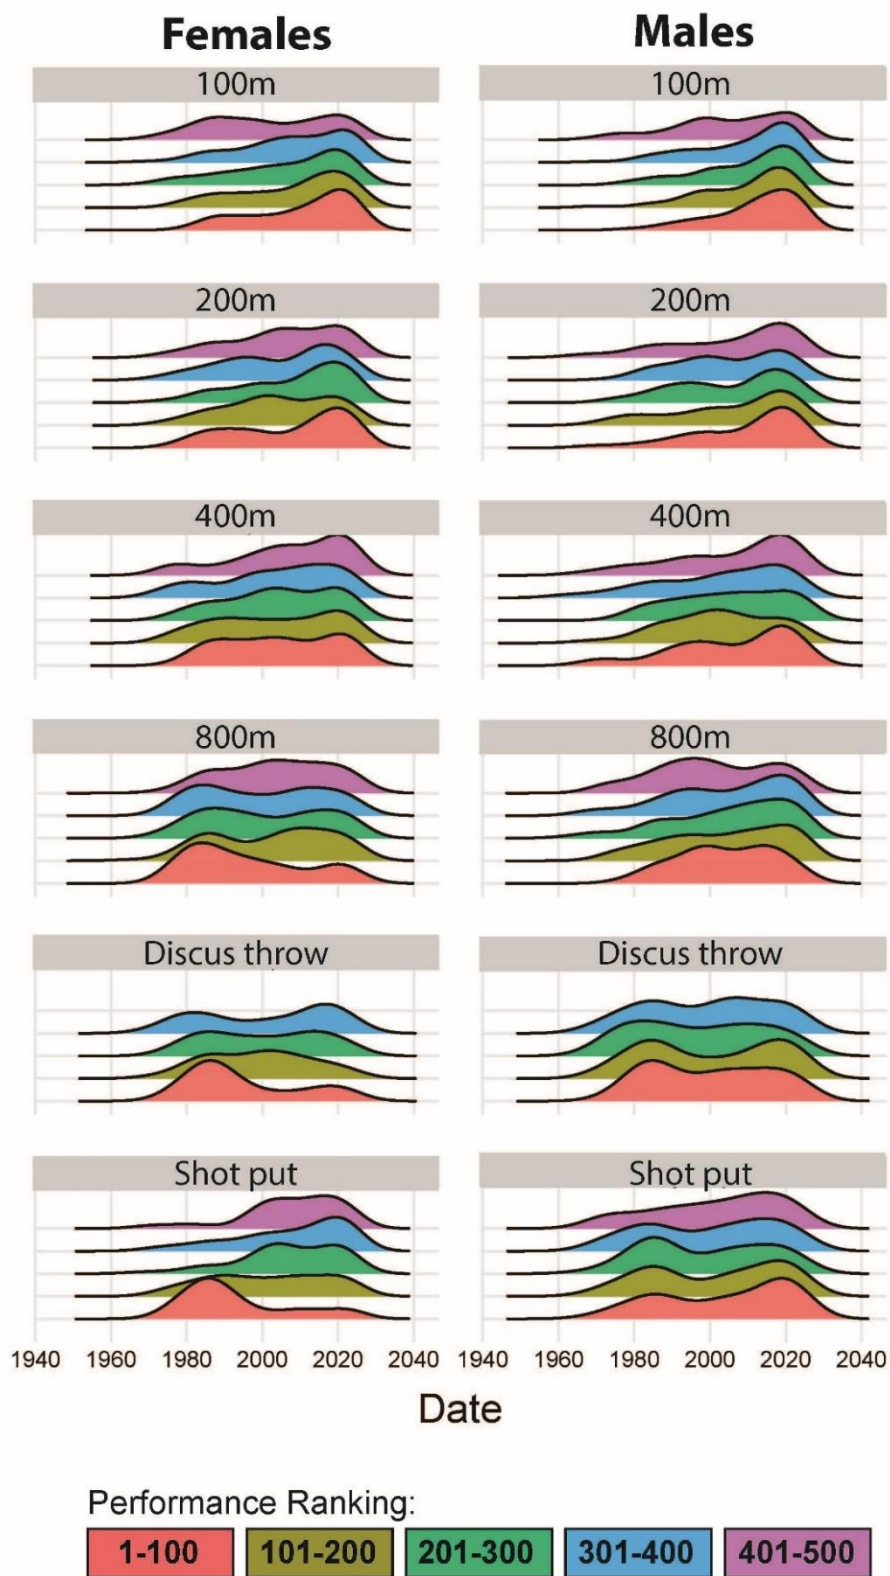

Figure 1.

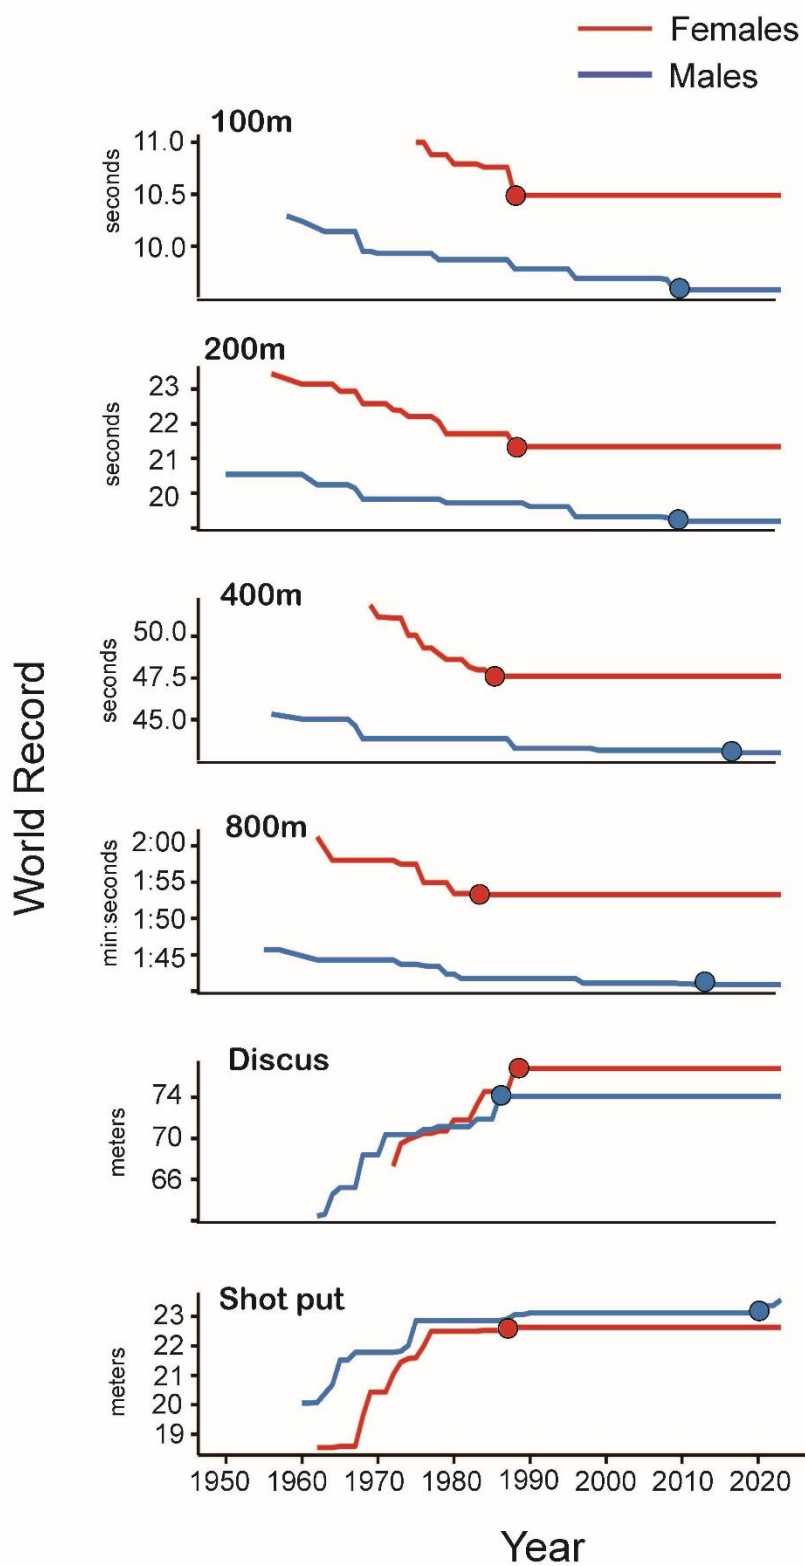

Figure 2.

**A. 1950-1989**

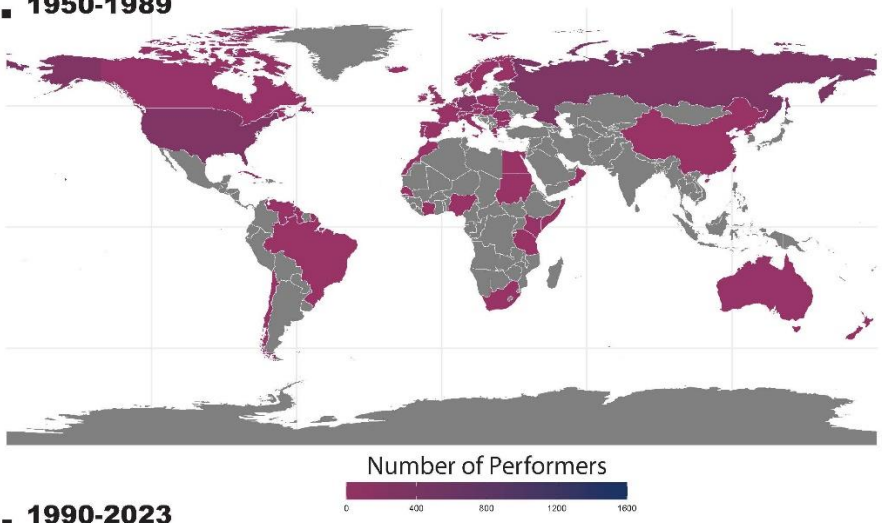

**B. 1990-2023**

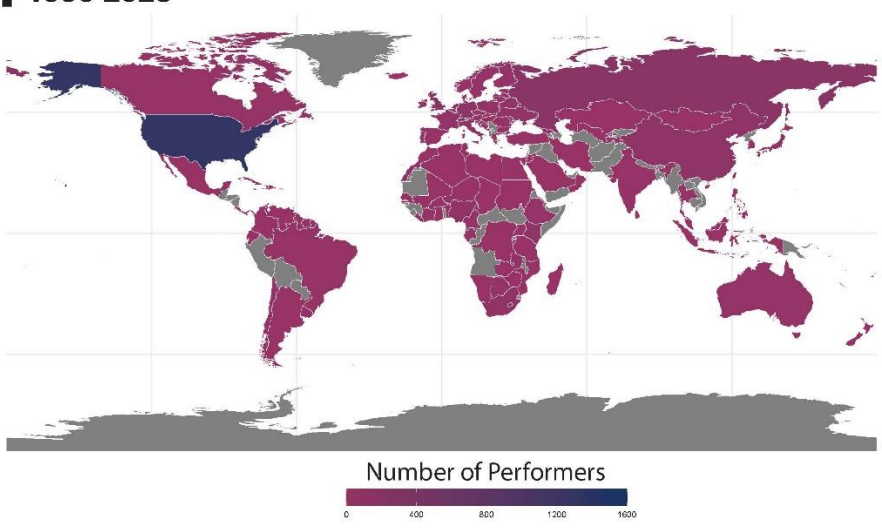

**C. All Time: 1950-2023**

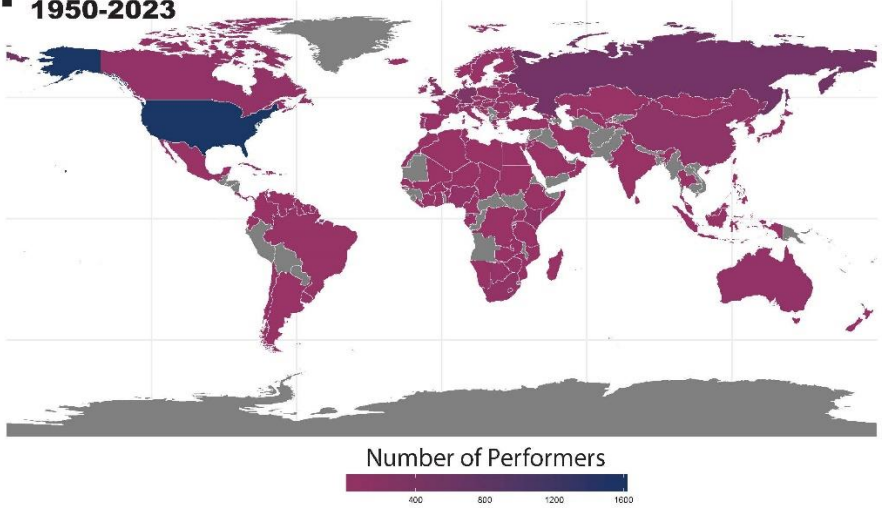

Figure 3.
